# Supplementary material for: The diagnosis of hepatic fibrosis by magnetic resonance and near-infrared imaging using dual-modality nanoparticles
Source: Royal Society of Chemistry journal article supplement (doi:10.1039/c7ra10847h), 2018-01-01
Supplement: c7ra10847h1.pdf [file c7ra10847h1.pdf]

## Hepatic Fibrosis Diagnose by Synergistic Magnetic Resonance and Near-Infrared Imaging with dual-modality nanoparticles

---

YunfangLi<sup>1†</sup>, WentingShang<sup>2†</sup>, XiaoyuanLiang<sup>2</sup>, ChaotingZeng<sup>2</sup>, MingmingLiu<sup>1</sup>,  
Sudan Wang<sup>1</sup>, HongjunLi<sup>1\*</sup>, JieTian<sup>2\*</sup>

<sup>1</sup>Department of Radiology, Beijing YouAn Hospital, Capital Medical University, Beijing, 100069, China

<sup>2</sup>Key Laboratory of Molecular Imaging, Institute of Automation, Chinese Academy of Sciences, Beijing 100190, China

†The parallel first authors: Ms. Yunfang Li, Dr. Wenting Shang.

\*The parallel corresponding authors: Prof. JieTian, Ph.D., Prof. Hongjun Li.

Professor Hongjun Li, M.D.

Director, Radiology department, Beijing YouAn Hospital, Capital Medical University

Address: 8 Xitoutiao, Youanmen, Fengtai district, Beijing, China

Zip code: 100069

Phone: +86 10 83997337; Fax: +86 10 63051128

E-mail: [lihongjun64@126.com](mailto:lihongjun64@126.com)

Prof. Jie Tian, Ph.D., FIEEE, FSPiE, FIAMBE, FAIMBE

President, Chinese Society for Molecular Imaging

Professor and Director, Key Laboratory of Molecular Imaging, Institute of Automation, Chinese Academy of Sciences

Professor and Director, Beijing Key Laboratory of Molecular Imaging

Address: Zhongguancun East Road #95, HaidianDist, Beijing 100190, P. R. China

Phone: +86 10 82618465; Fax: +86 10 62527995

Email: [jie.tian@ia.ac.cn](mailto:jie.tian@ia.ac.cn)

## Supporting Information

Supplemental Figure 1.

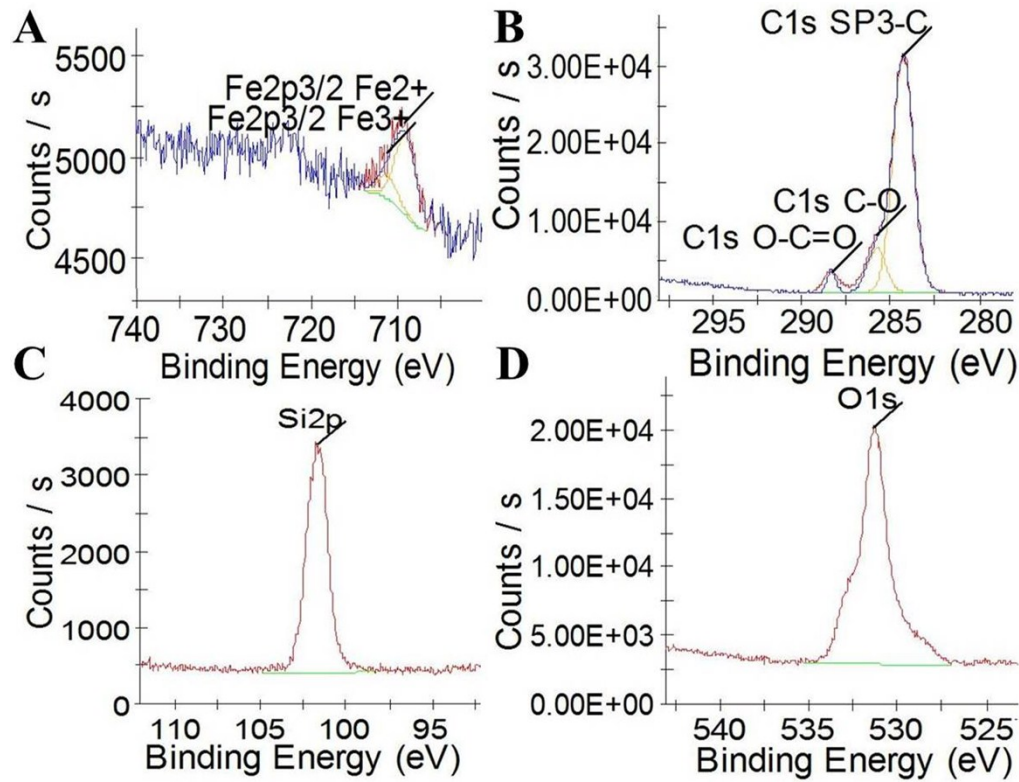

Supplemental Figure 1. The XPS high-resolution spectra of Fe2p(A), C1s(B), Si2p(C) and O1s(D) from the fractured surfaces of the SPIO@SiO<sub>2</sub>.

Supplemental Figure 2, 3

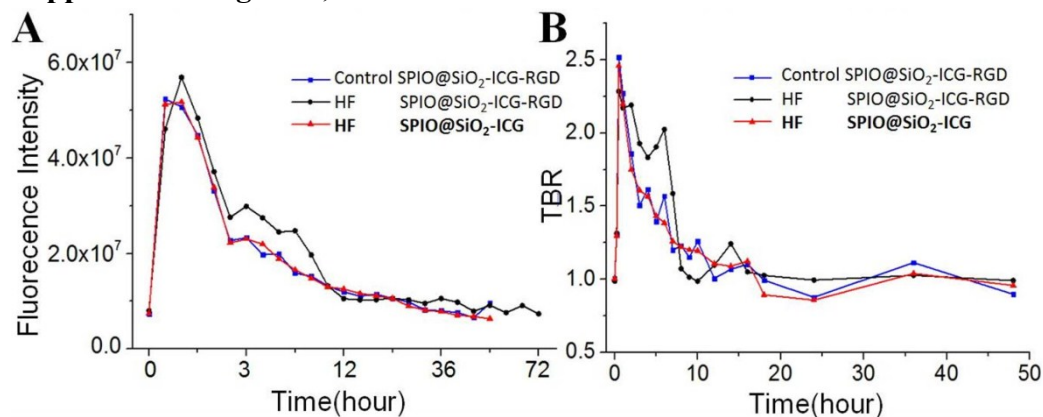

Supplemental Figure 2: *In vivo* biodistribution of the fluorescence intensity of SPIO@SiO<sub>2</sub>-ICG for hepatic fibrosis mouse models. (A) The fluorescence intensity profile of the SPIO@SiO<sub>2</sub>-ICG (red line). (B) The target to background ratio (TBR) profiles of the SPIO@SiO<sub>2</sub>-ICG (red line).

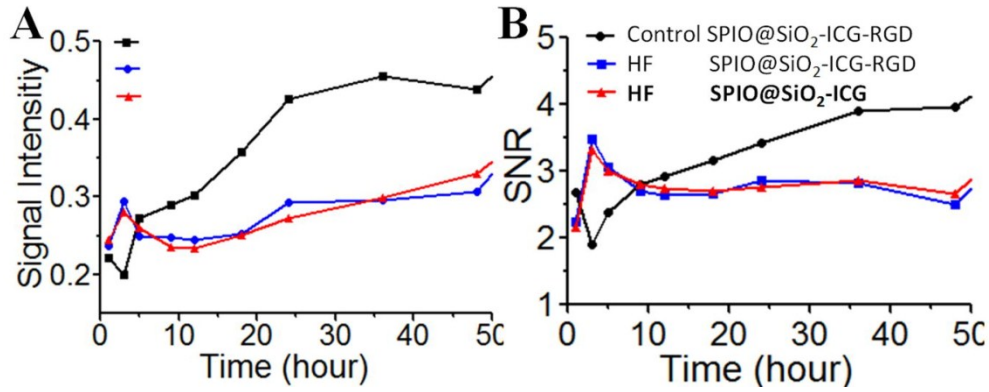

**Supplemental Figure 3:** *In vivo* biodistribution of MR intensity of SPIO@SiO<sub>2</sub>-ICG for hepatic fibrosis mouse models. (A, B) The MRI intensity profiles of the SPIO@SiO<sub>2</sub>-ICG (red line).

**Supplemental Table 1:** Serum Biochemical Analysis (mean±SD)

|                                    | Treatment group | Control group | <i>P</i> value |
|------------------------------------|-----------------|---------------|----------------|
| Aspartate aminotransferase (U/L)   | 74.33±128.75    | 81.70±71.06   | 0.072          |
| Alanine aminotransferase (U/L)     | 50.97±44.24     | 15.27±11.48   | 0.006          |
| Total bilirubin (μmol/L)           | 24.83±12.29     | 12.13±8.43    | 0.214          |
| Direct bilirubin (μmol/L)          | 0.83±0.64       | 1.03±0.68     | 0.730          |
| Total protein (g/L)                | 75.40±16.44     | 64.67±4.38    | 0.336          |
| Albumin (g/L)                      | 32.10±4.06      | 30.93±1.27    | 0.659          |
| Globulin (g/L)                     | 43.30±12.44     | 33.73±5.58    | 0.291          |
| Gamma-glutamyltranspeptidase (U/L) | 14.80±14.58     | 2.80±3.94     | 0.410          |
| Alkaline phosphatase(ALP) (U/L)    | 36.60±3.99      | 63.43±53.30   | 0.475          |
| Creatinine kinase (U/L)            | 9.12±1.50       | 9.91±0.71     | 0.238          |
| Urea (mmol/L)                      | 24.20±12.61     | 11.97±8.61    | 0.458          |
| Uric acid (μmol/L)                 | 51.93±22.05     | 78.50±35.25   | 0.331          |
| Glucose (mmol/L)                   | 13.50±5.53      | 14.09±2.24    | 0.873          |
| Cholesterol (mmol/L)               | 2.32±0.06       | 2.08±0.49     | 0.444          |
| Na (mmol/L)                        | 137.37±8.35     | 142.23±2.63   | 0.390          |
| Cl (mmol/L)                        | 98.90±5.67      | 103.50±1.71   | 0.250          |

\**p*<0.05
